# Supplementary material
Source: Springer Nature journal article supplement (https://www.springermedizin.de/resource/supplementary/12874_2013_978_MOESM3_ESM.pdf/9432980)

**N=10**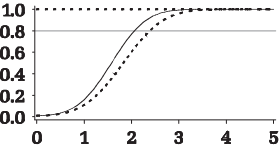**N=20**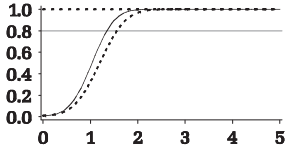**N=40**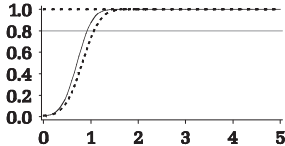

Mean difference

Mean difference

Mean difference

Supplement: MOESM3 [file 9432980]
